# Supplementary material for: Syndiospecific coordination (Co)polymerization of carbazole-substituted styrene derivatives using the scandium catalyst system
Source: Royal Society of Chemistry journal article supplement (doi:10.1039/d1py00896j), 2021-01-01
Supplement: d1py00896j1.pdf [file d1py00896j1.pdf]

Supporting information

## Syndiospecific Coordination (Co)Polymerization of Carbazole-Substituted Styrene Derivatives by Scandium Catalyst System

Xiaochun Mu, Yang Li\*

State Key Laboratory of Fine Chemicals, Liaoning Key Laboratory of Polymer Science and Engineering, Department of Polymer Science and Engineering, School of Chemical Engineering, Dalian University of Technology, Dalian 116024, China  
E-mail: [liyong@dlut.edu.cn](mailto:liyong@dlut.edu.cn)

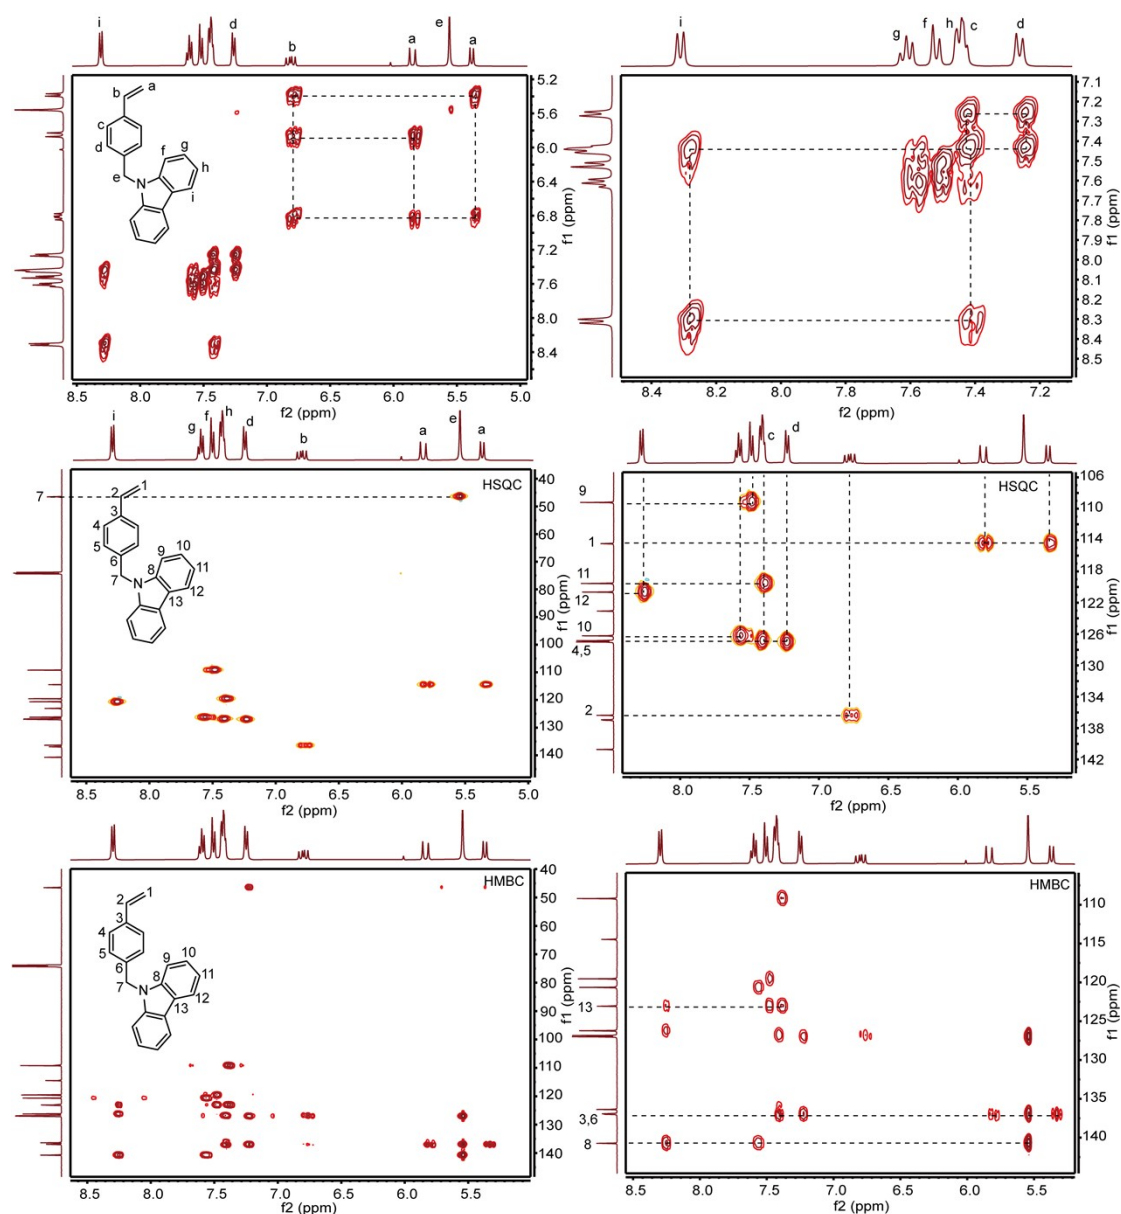

Fig. S1 COSY, HSQC and HMBC spectra of FSt1.

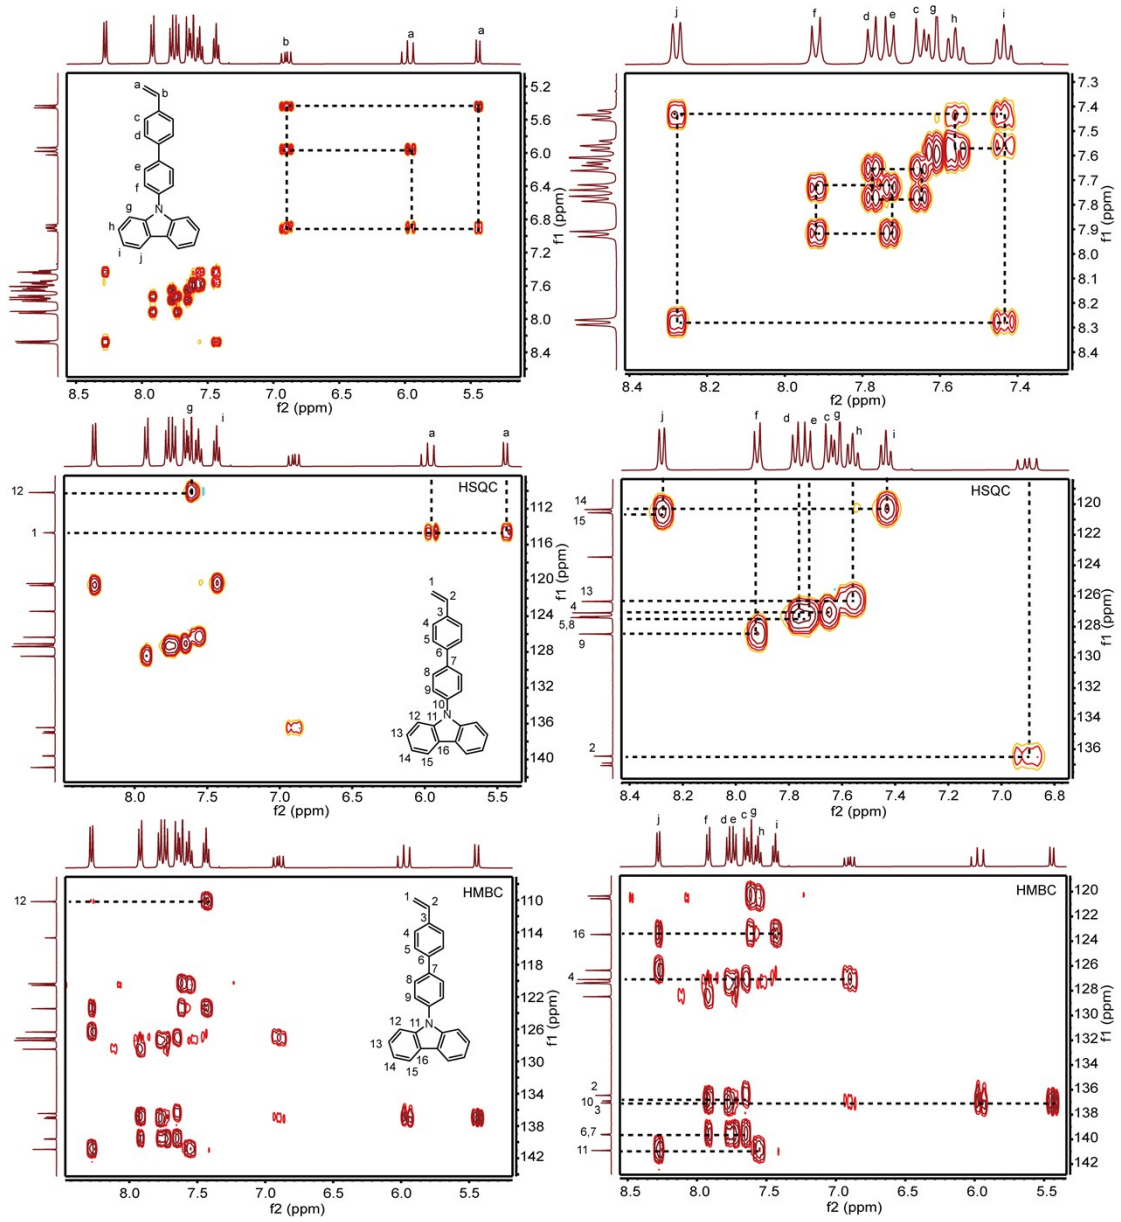

**Fig. S2** COSY, HSQC and HMBC spectra of FSt2.

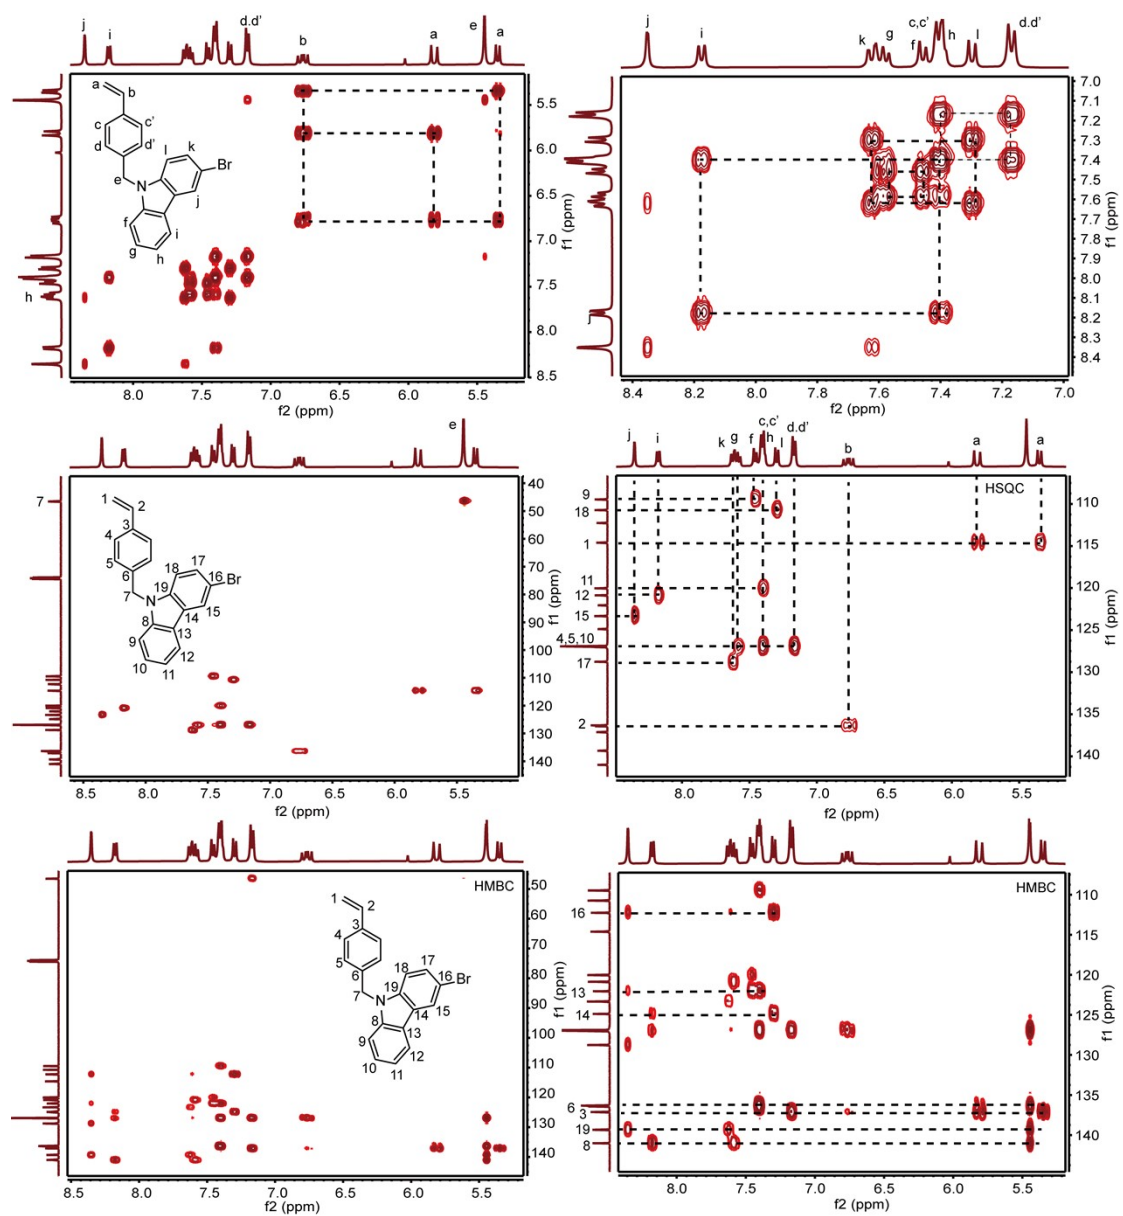

Fig. S3 COSY, HSQC and HMBC spectra of FSt3.

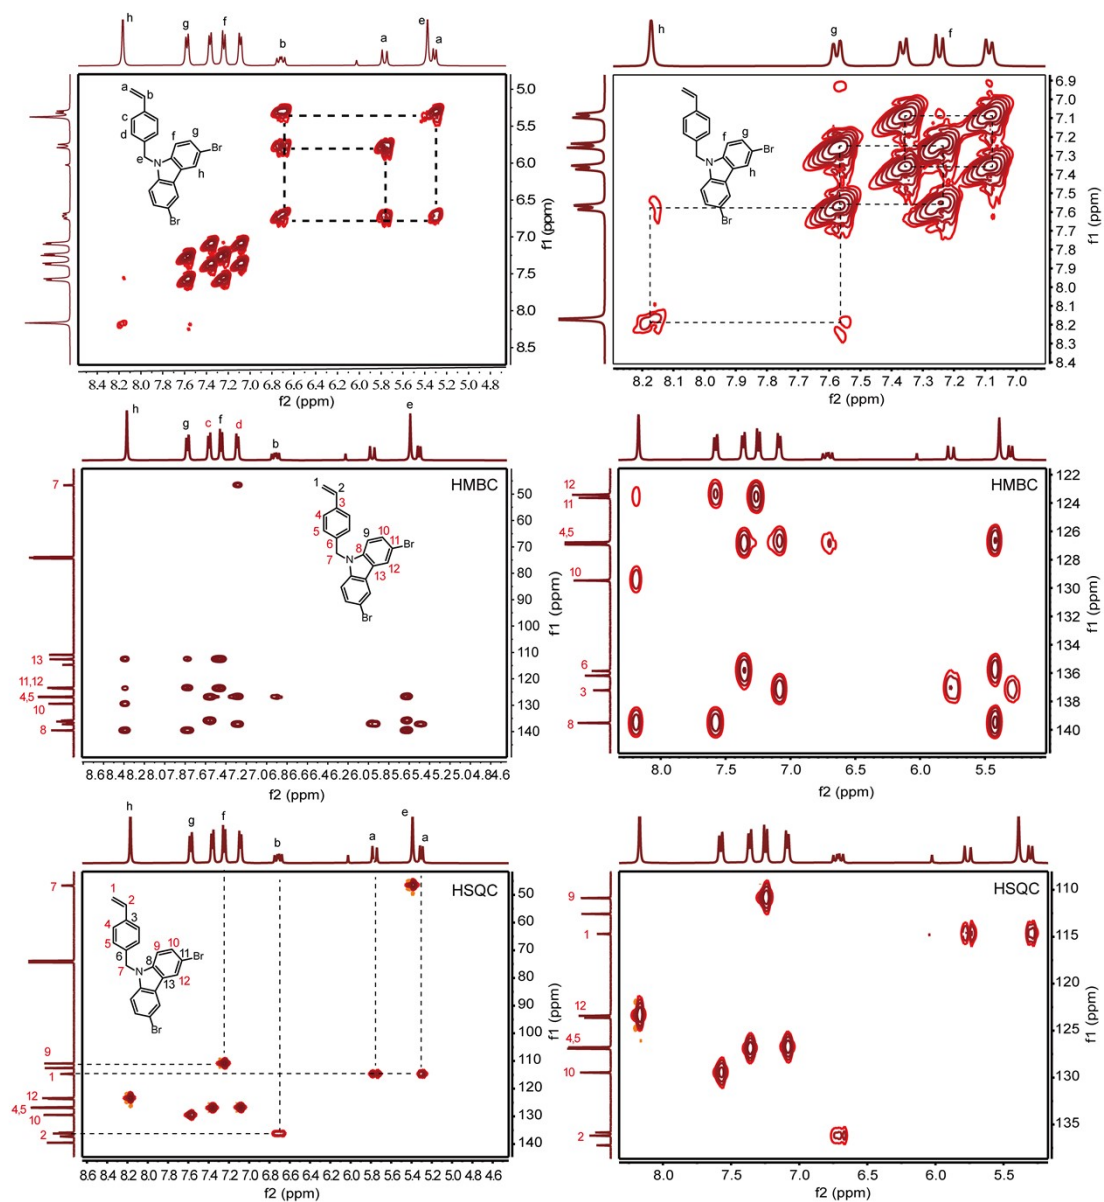

**Fig. S4** COSY, HSQC and HMBC spectra of FSt4.

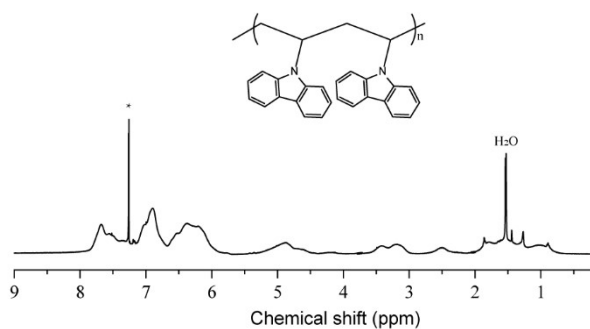

**Fig. S5**  $^1\text{H}$  NMR spectra of homopolymer of NVC by Sc complex. (Table 1, run 1)

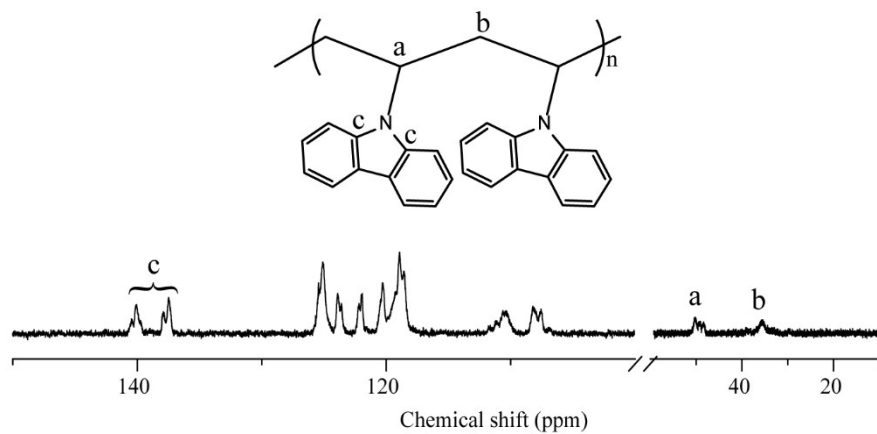

**Fig. S6**  $^{13}\text{C}$  NMR spectra of homopolymer of NVC by Sc complex. (Table 1, run 1)

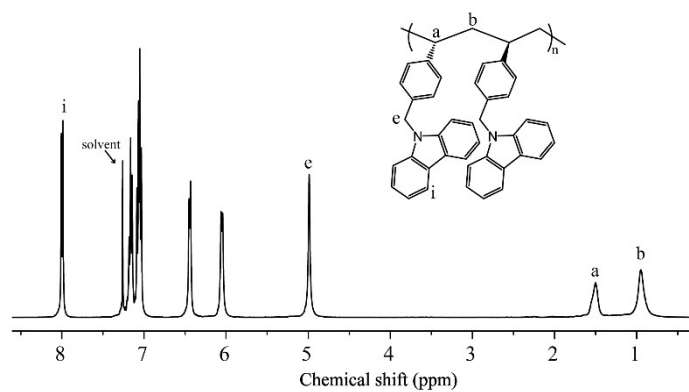

**Fig. S7**  $^1\text{H}$  NMR spectra of homopolymer of FSt1 by Sc complex. ( $\text{CDCl}_3$ , Table 1, run 3)

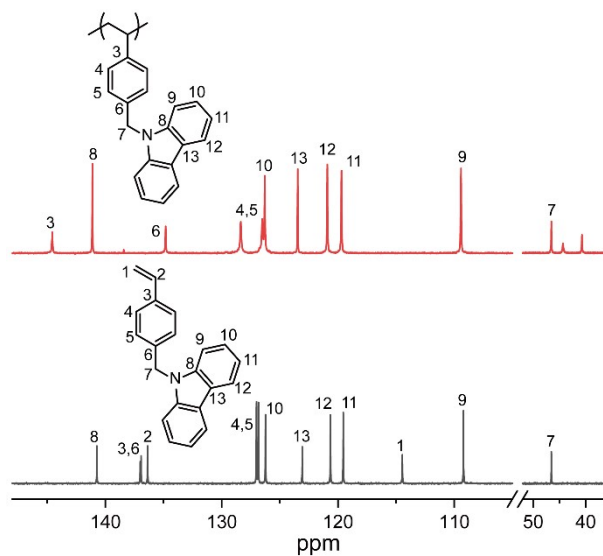

**Fig. S8**  $^{13}\text{C}$  NMR spectra of monomer and homopolymer of FSt1 by Sc complex.

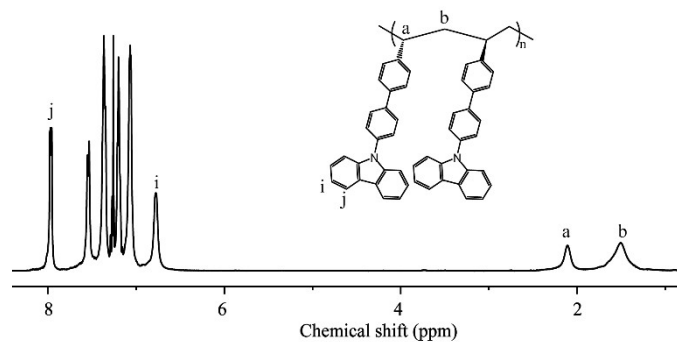

**Fig. S9**  $^1\text{H}$  NMR spectra of homopolymer of FSt2 by Sc complex. ( $\text{CDCl}_3$ , Table 1, run 7)

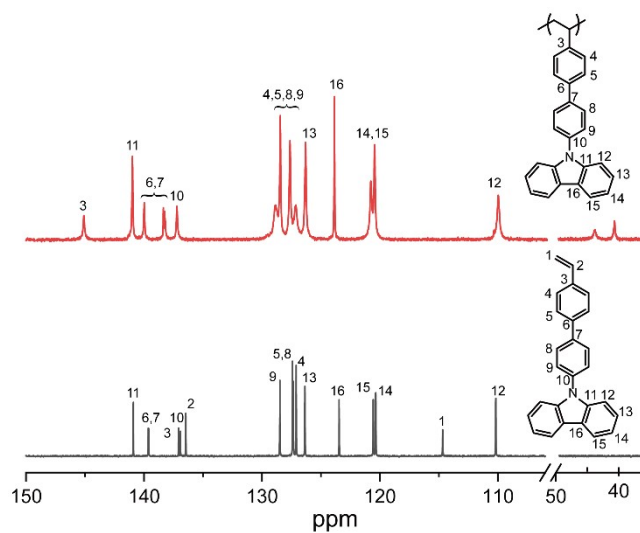

**Fig. S10**  $^{13}\text{C}$  NMR spectra of monomer and homopolymer of FSt2 by Sc complex.

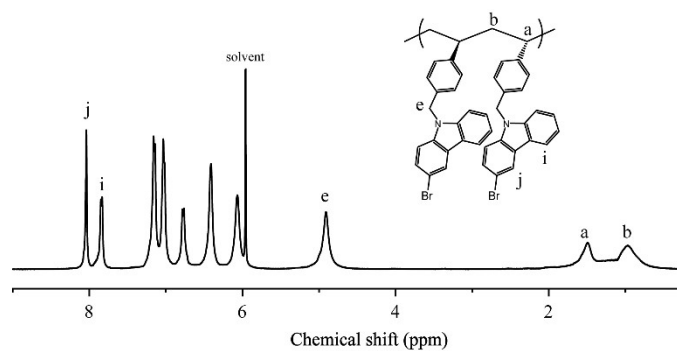

**Fig. S11**  $^1\text{H}$  NMR spectra of homopolymer of FSt3 by Sc complex. ( $\text{C}_2\text{D}_2\text{Cl}_4$ , Table 1, run 12)

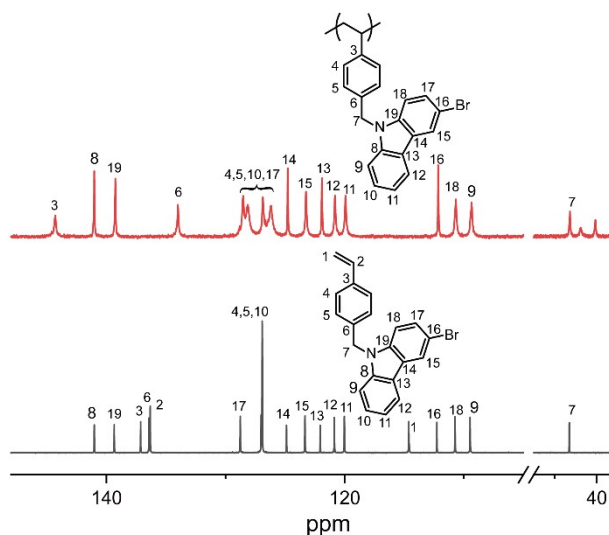

**Fig. S12**  $^{13}\text{C}$  NMR spectra of monomer and homopolymer of FSt3 by Sc complex.

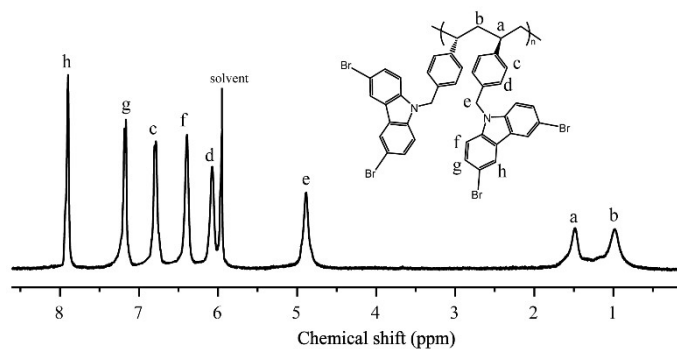

**Fig. S13**  $^1\text{H}$  NMR spectra of homopolymer of FSt4 by Sc complex. ( $\text{C}_2\text{D}_2\text{Cl}_4$ , Table 1, run 15)

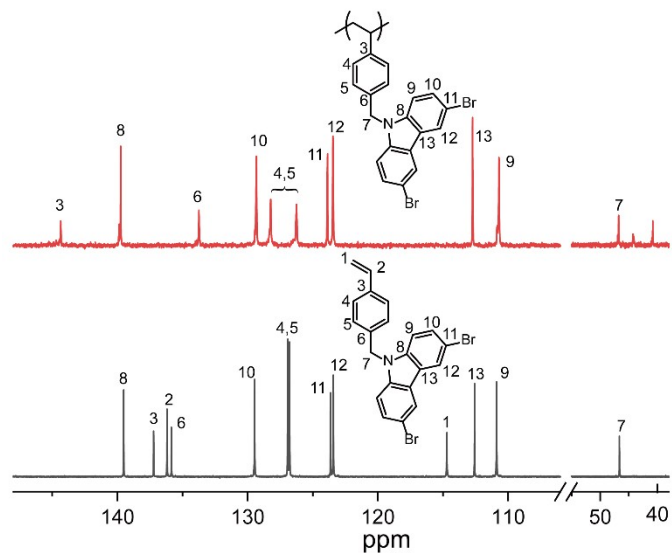

**Fig. S14**  $^{13}\text{C}$  NMR spectra of monomer and homopolymer of FSt4 by Sc complex.

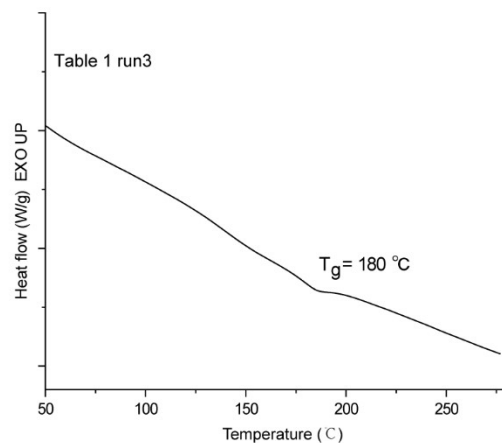

**Fig. S15** DSC curves of homopolymer of FSt1 by Sc complex (Table 1, run 1).

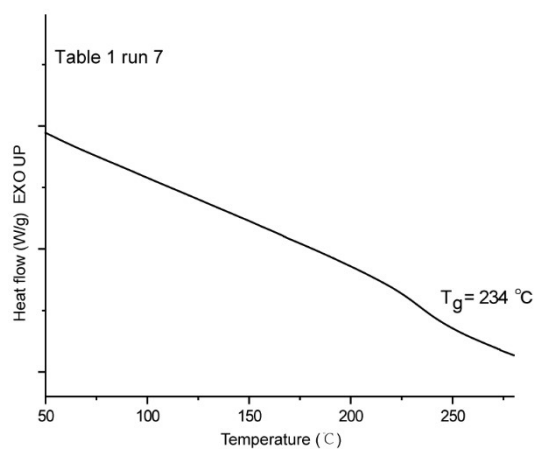

**Fig. S16** DSC curves of homopolymer of FSt2 by Sc complex (Table 1, run 7).

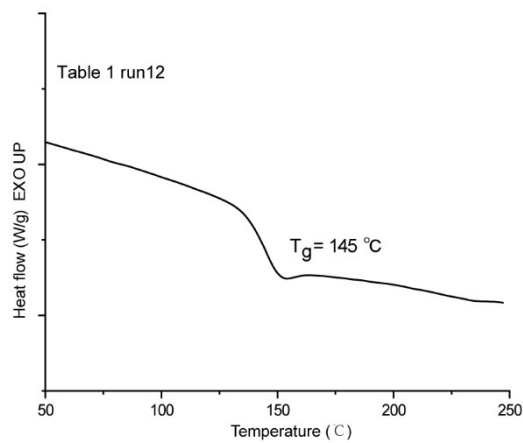

**Fig. S17** DSC curves of homopolymer of FSt3 by Sc complex (Table 1, run 12).



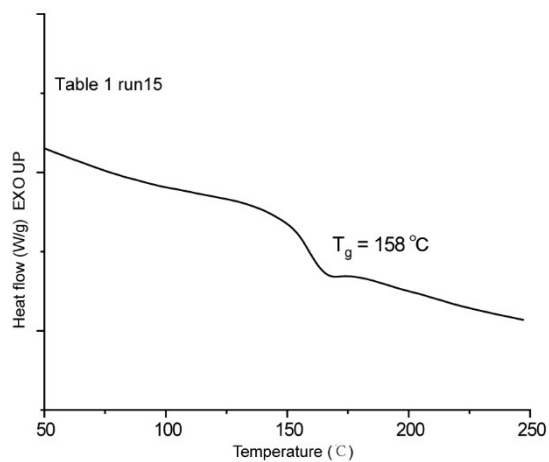

**Fig. S18** DSC curves of homopolymer of FSt4 by Sc complex (Table 1, run 15).

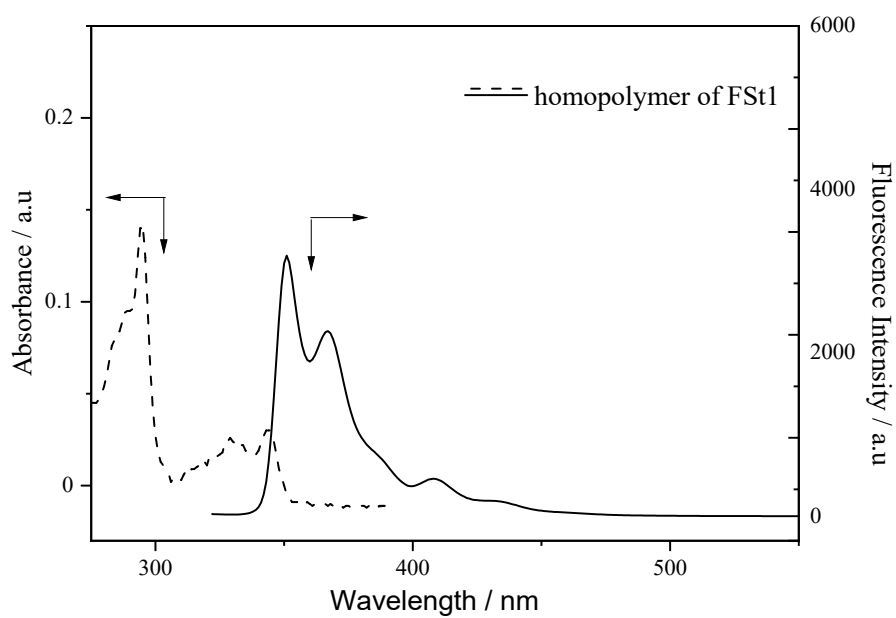

**Fig. S19** UV-vis and FL curves of FSt1 homopolymer in THF (dashed lines represent UV and solid lines represent FL curves)

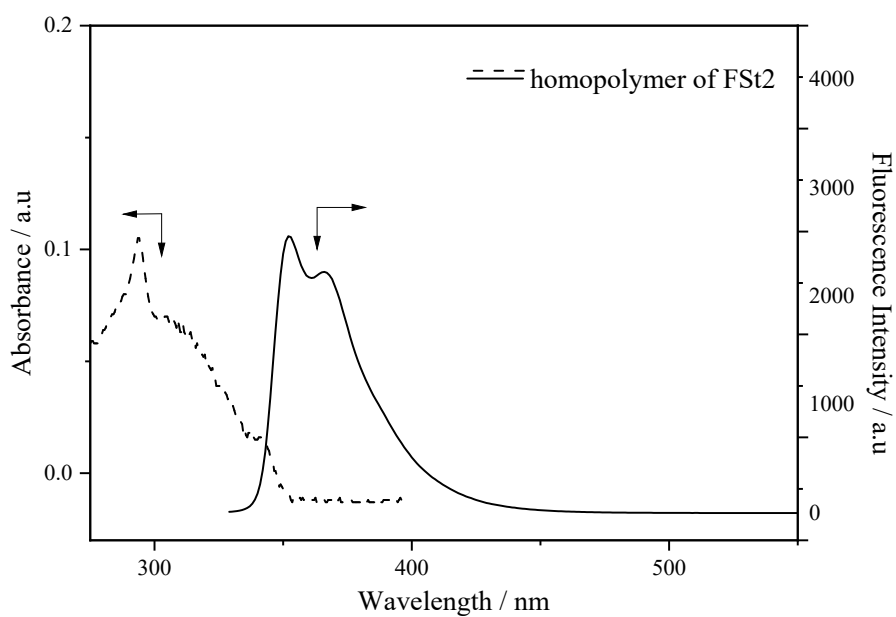

**Fig. S20** UV-vis and FL curves of FSt2 homopolymer in THF (dashed lines represent UV and solid lines represent FL curves)

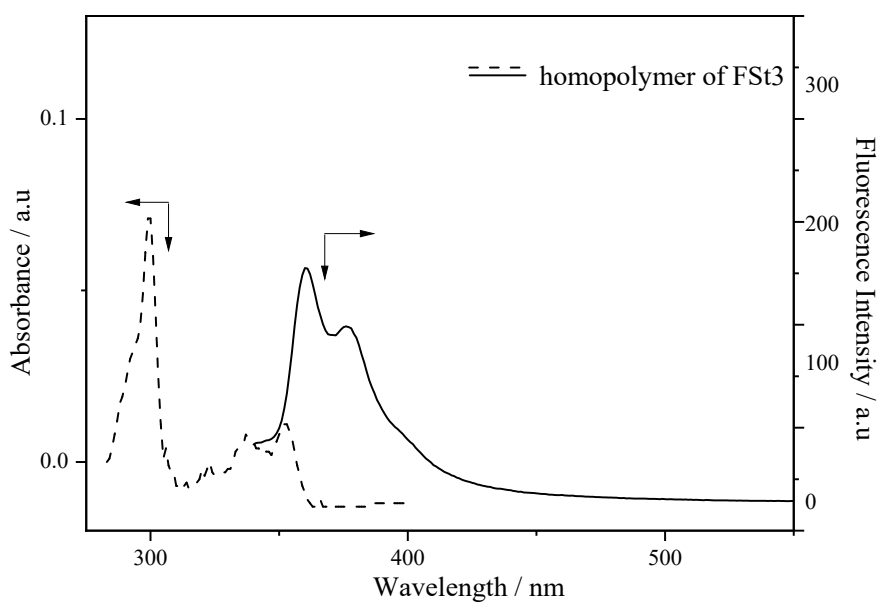

**Fig. S21** UV-vis and FL curves of FSt3 homopolymer in THF (dashed lines represent UV and solid lines represent FL curves)

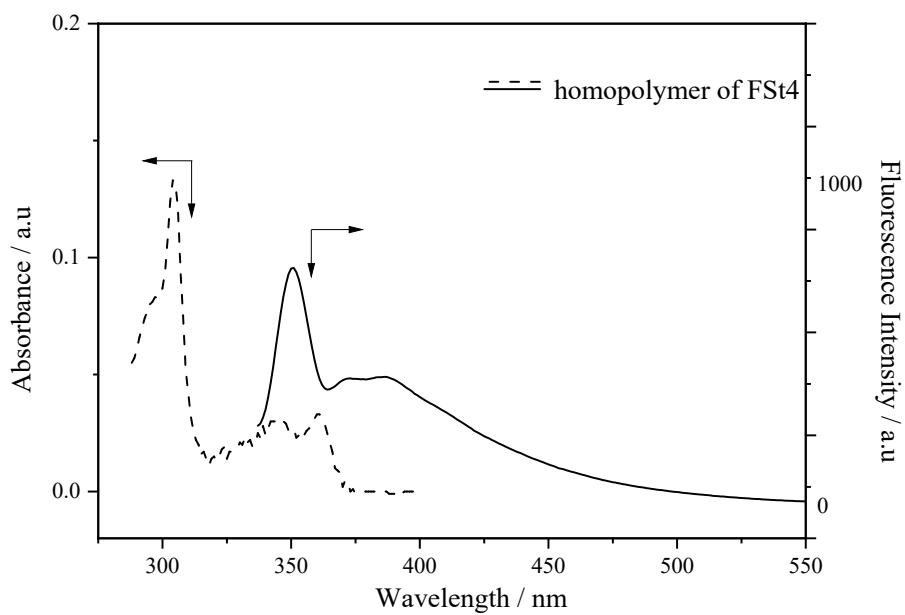

**Fig. S22** UV-vis and FL curves of FSt4 homopolymer in THF (dashed lines represent UV and solid lines represent FL curves)

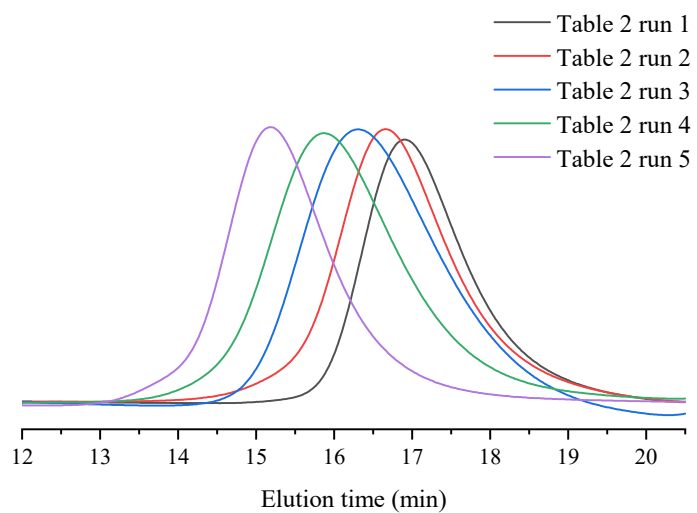

**Fig. S23** GPC curves of FSt1 with St copolymers with different FSt1 contents. (Table 2, run 1-5).

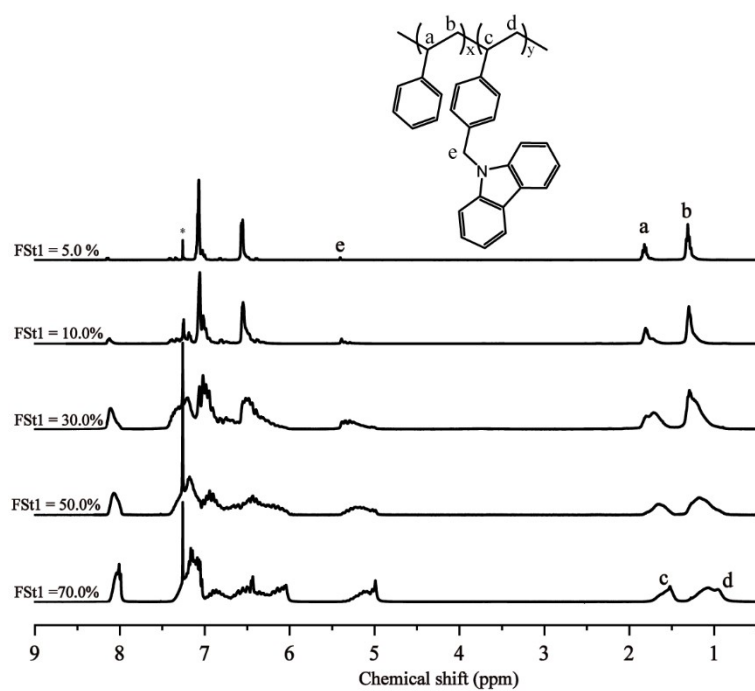

**Fig. S24**  $^1\text{H}$  NMR spectra of FSt1 with St copolymers with different FSt1 contents. (Table 2, run 1-5)

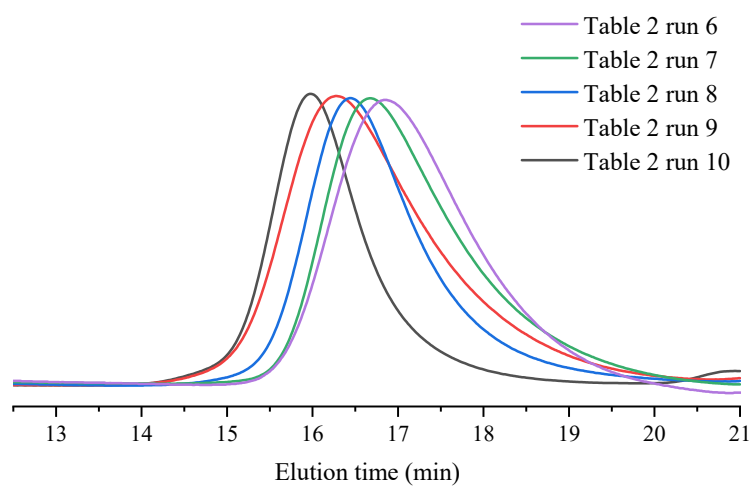

**Fig. S25** GPC curves of FSt2 with St copolymers with different FSt2 contents. (Table 2, run 6-10).

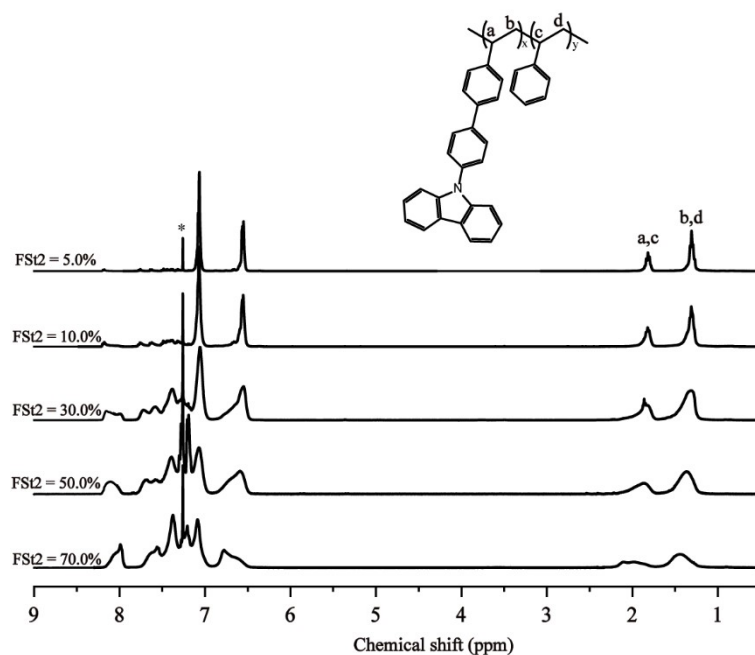

**Fig. S26**  $^1\text{H}$  NMR spectra of FSt2 with St copolymers with different FSt2 contents. (Table 2, run 6-10)

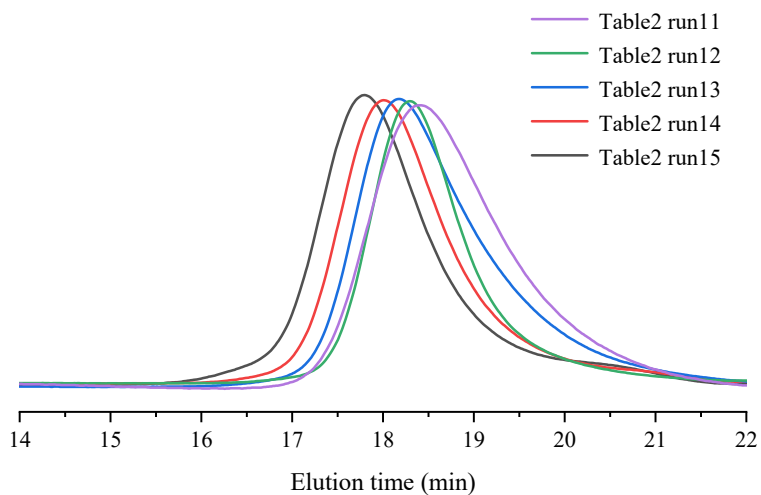

**Fig. S27** GPC curves of FSt3 with St copolymers with different FSt3 contents. (Table 2, run 11-15).

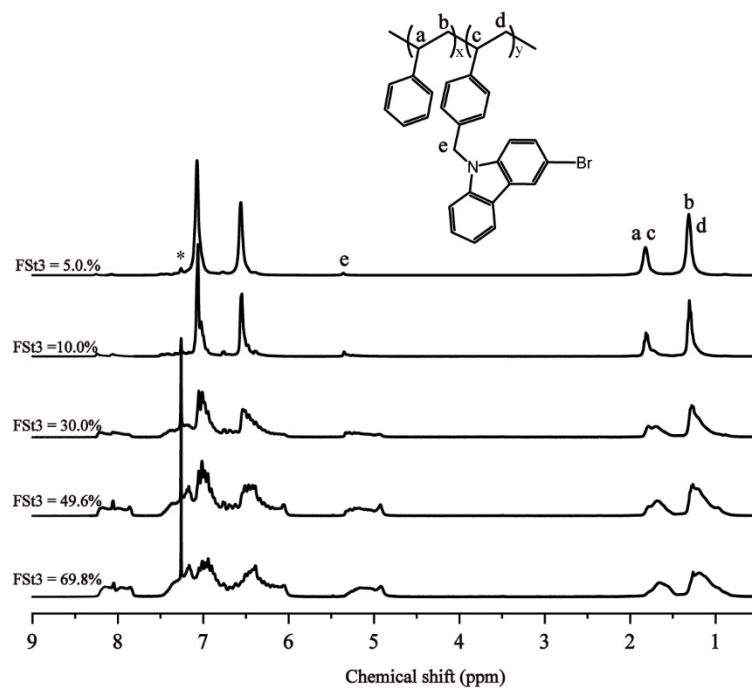

**Fig. S28**  $^1\text{H}$  NMR spectra of FSt3 with St copolymers with different FSt3 contents. (Table 2, run 11-15)

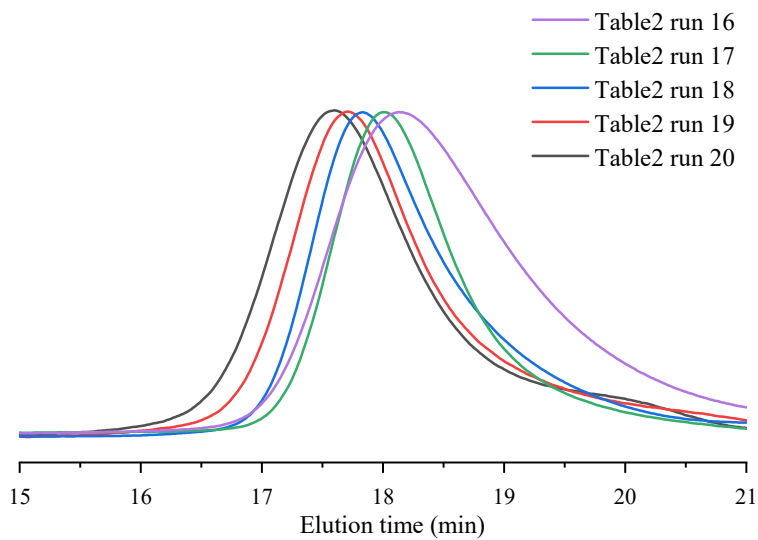

**Fig. S29** GPC curves of FSt4 with St copolymers with different FSt4 contents. (Table 2, run 16-20).

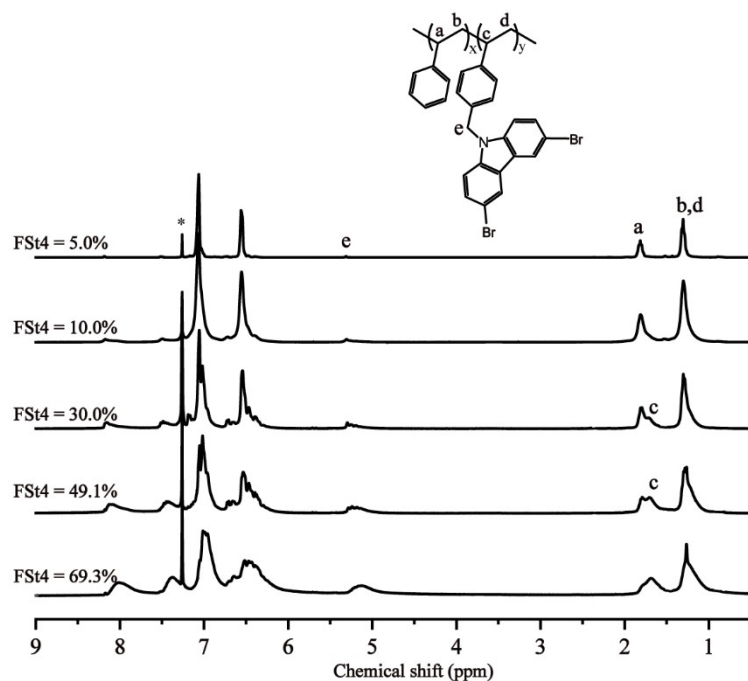

**Fig. S30**  $^1\text{H}$  NMR spectra of FSt4 with St copolymers with different FSt4 contents. (Table 2, run 16-20)

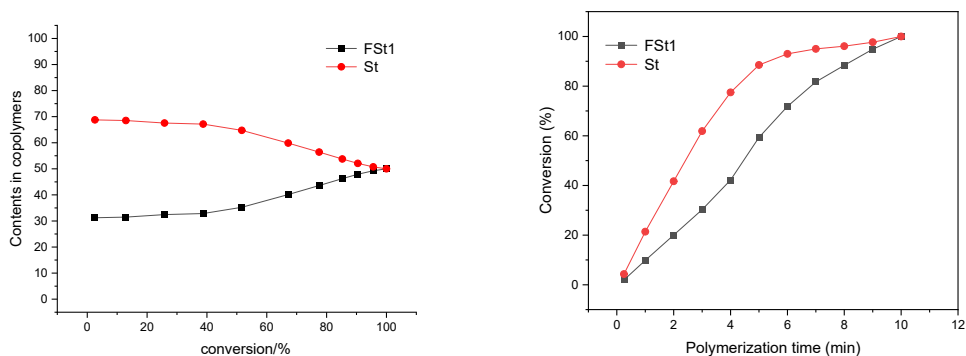

**Fig. S31** (a) Plots of the contents of FSt1 and styrene units in the copolymers versus the conversions; (b) Monomer conversions versus polymerization time.

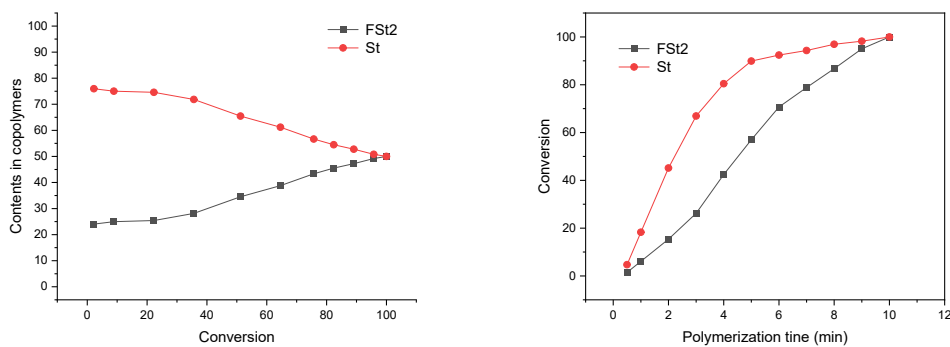

**Fig. S32** (a) Plots of the contents of FSt2 and styrene units in the copolymers versus the conversions; (b) Monomer conversions versus polymerization time.

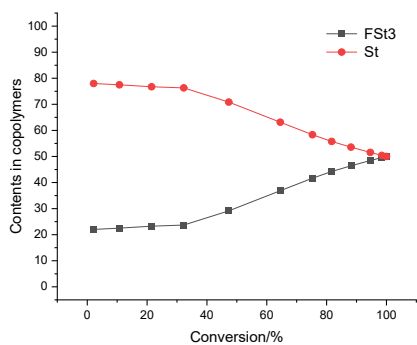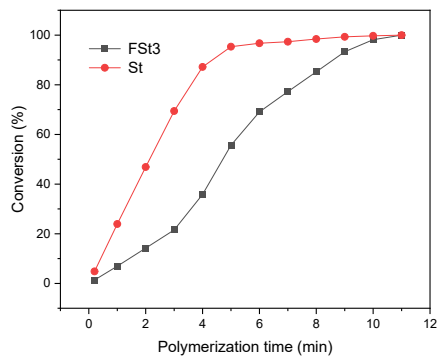

**Fig. S33** (a) Plots of the contents of FSt3 and styrene units in the copolymers versus the conversions; (b) Monomer conversions versus polymerization time.

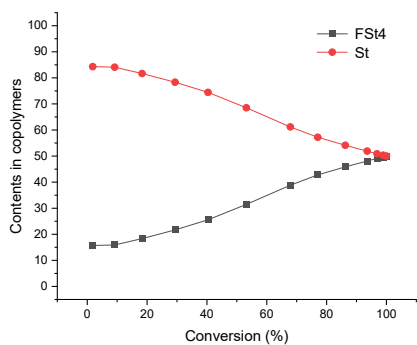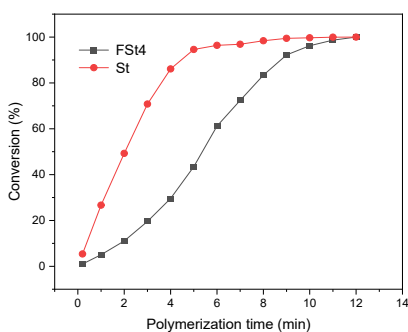

**Fig. S34** (a) Plots of the contents of FSt4 and styrene units in the copolymers versus the conversions; (b) Monomer conversions versus polymerization time.
